# Supplementary material for: Biochemical analysis of antimicrobial peptides in two different Capsicum genotypes after fruit infection by Colletotrichum gloeosporioides
Source: PubMed Central journal article supplement (PMC6481241; doi:10.1042/bsr20181889), 2019-04-23
Supplement: bsr20181889_Supp1.pdf [file bsr20181889_Supp1.pdf]

**A**

*Capsicum annuum*  
UENF 1381

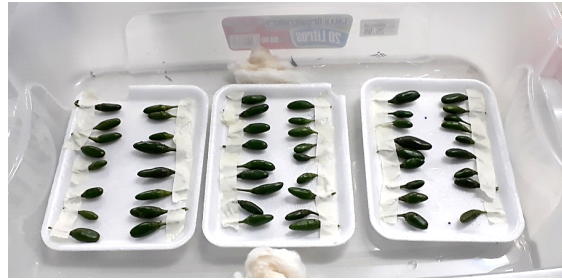**B**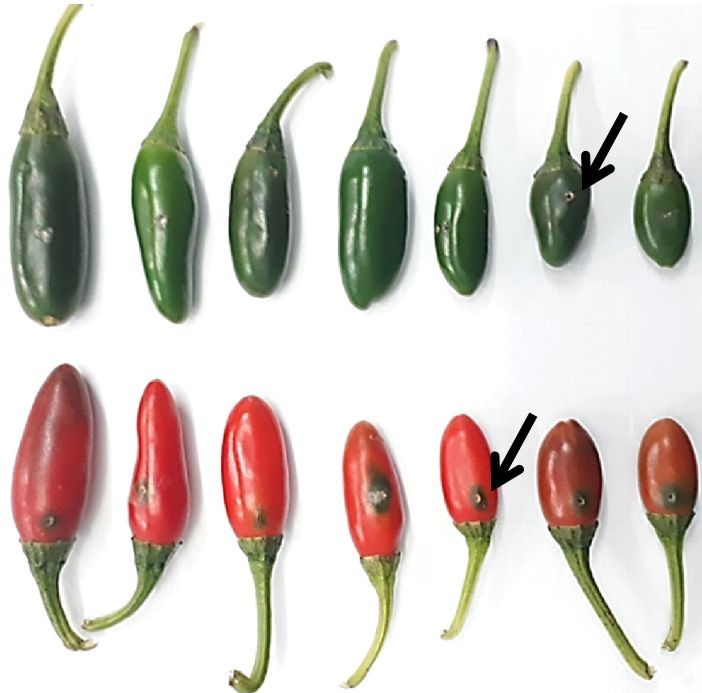

**Supplementary material.** (A) Humid chamber with immature fruits after injury created in the middle region of each fruit with a sterilized needle followed by inoculation with 20  $\mu$ L of the *C. gloeosporioides* fungus spore solution. (B) Immature and ripe fruits ranging from 2 to 5 cm in length and 1 to 1.5 g per fruit after 48h of inoculation with *C. gloeosporioides* fungus spore. Arrows indicate the point of inoculation.
